# Supplementary material for: Novel axonemal protein ZMYND12 interacts with TTC29 and DNAH1, and is required for male fertility and flagellum function
Source: eLife journal article supplement (doi:10.7554/elife.87698), 2023-06-12
Supplement: fig5-data2 [file elife-87698-fig5-data2-v1.zip]

**B**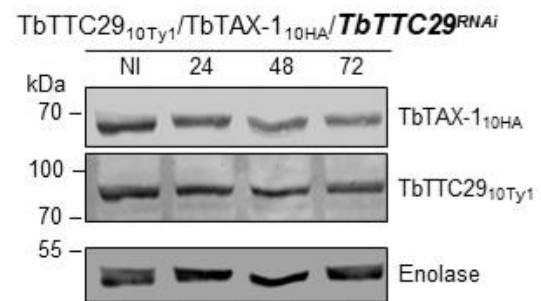

TTC29<sub>10Ty1</sub>/TAX1<sub>10HA</sub>/*RNAi* **TTC29**

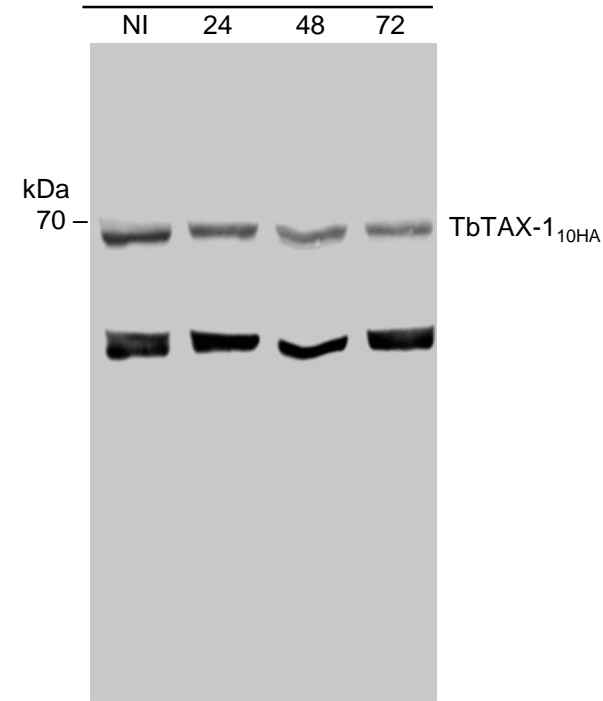

Anti-HA + anti-Enolase

TTC29<sub>10Ty1</sub>/TAX1<sub>10HA</sub>/*RNAi* **TTC29**

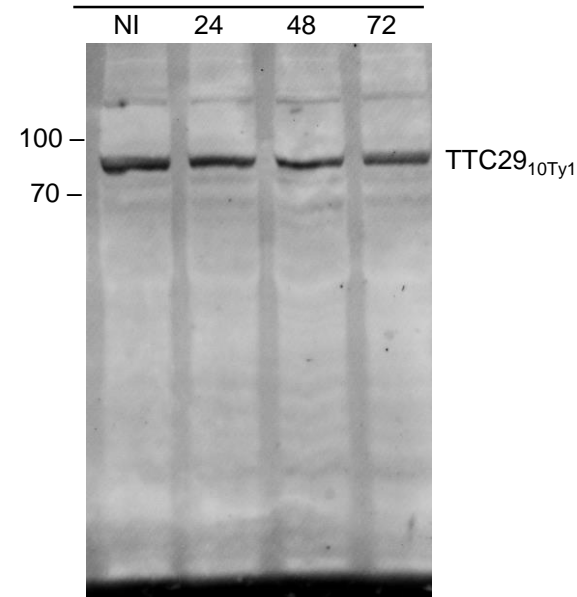

Anti-TY1
