# Supplementary figures and images for: Novel axonemal protein ZMYND12 interacts with TTC29 and DNAH1, and is required for male fertility and flagellum function
Source: eLife journal article supplement (doi:10.7554/elife.87698), 2023-06-12

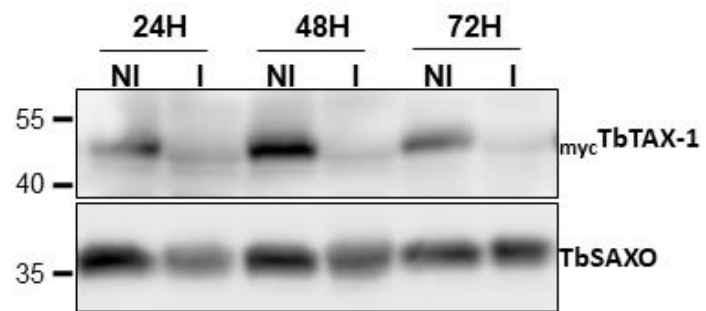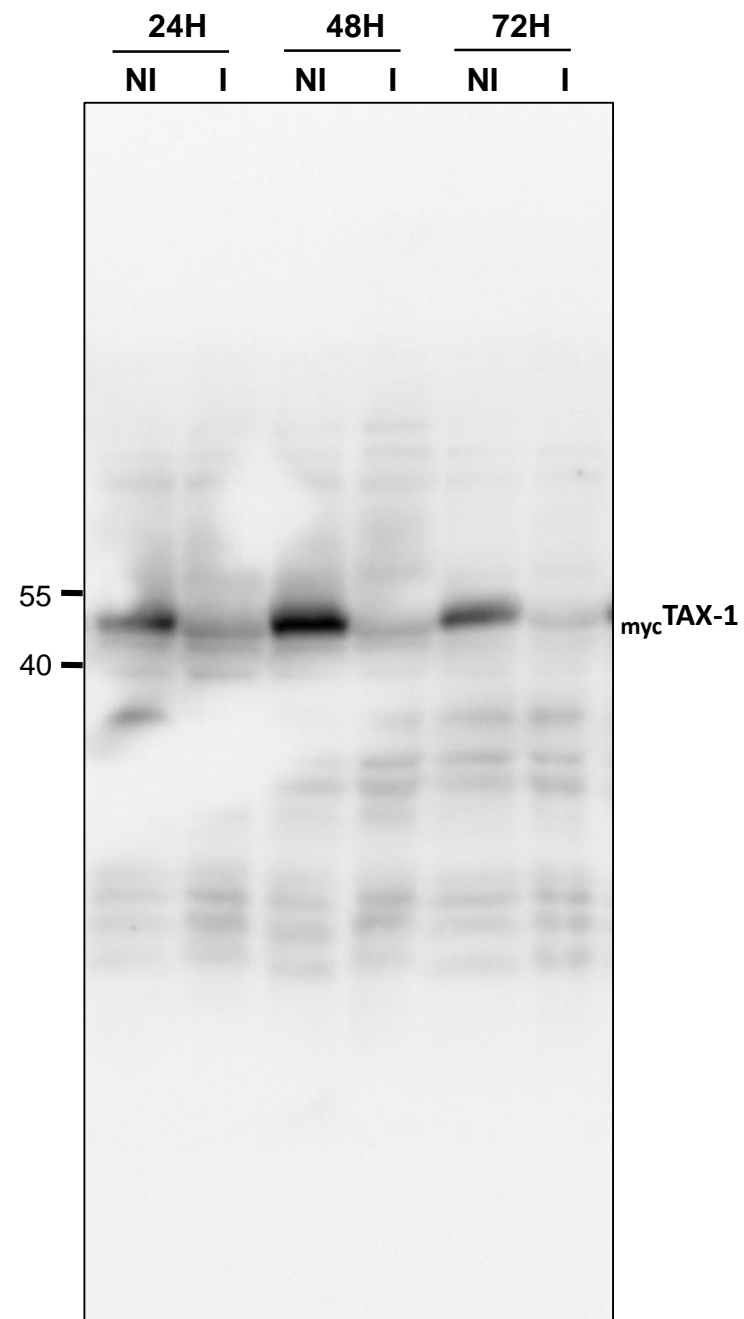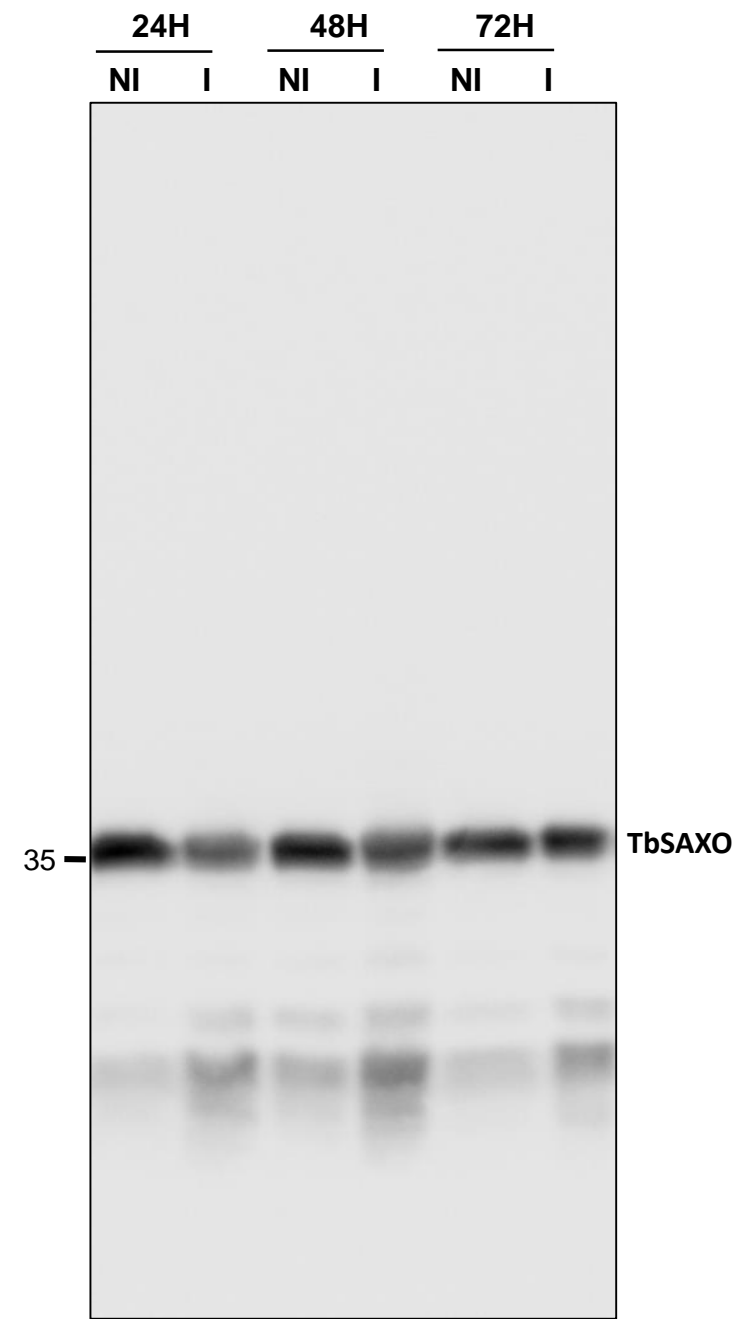

Supplement: fig3-data1 [file elife-87698-fig3-data1-v1.zip]

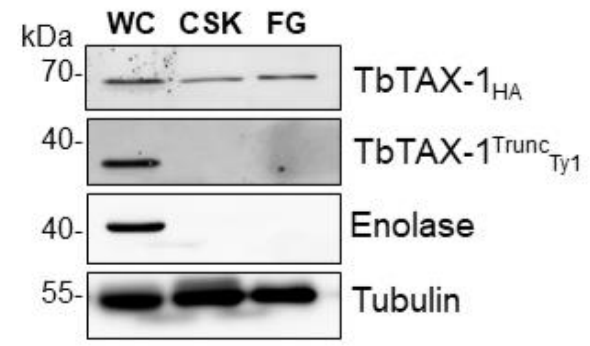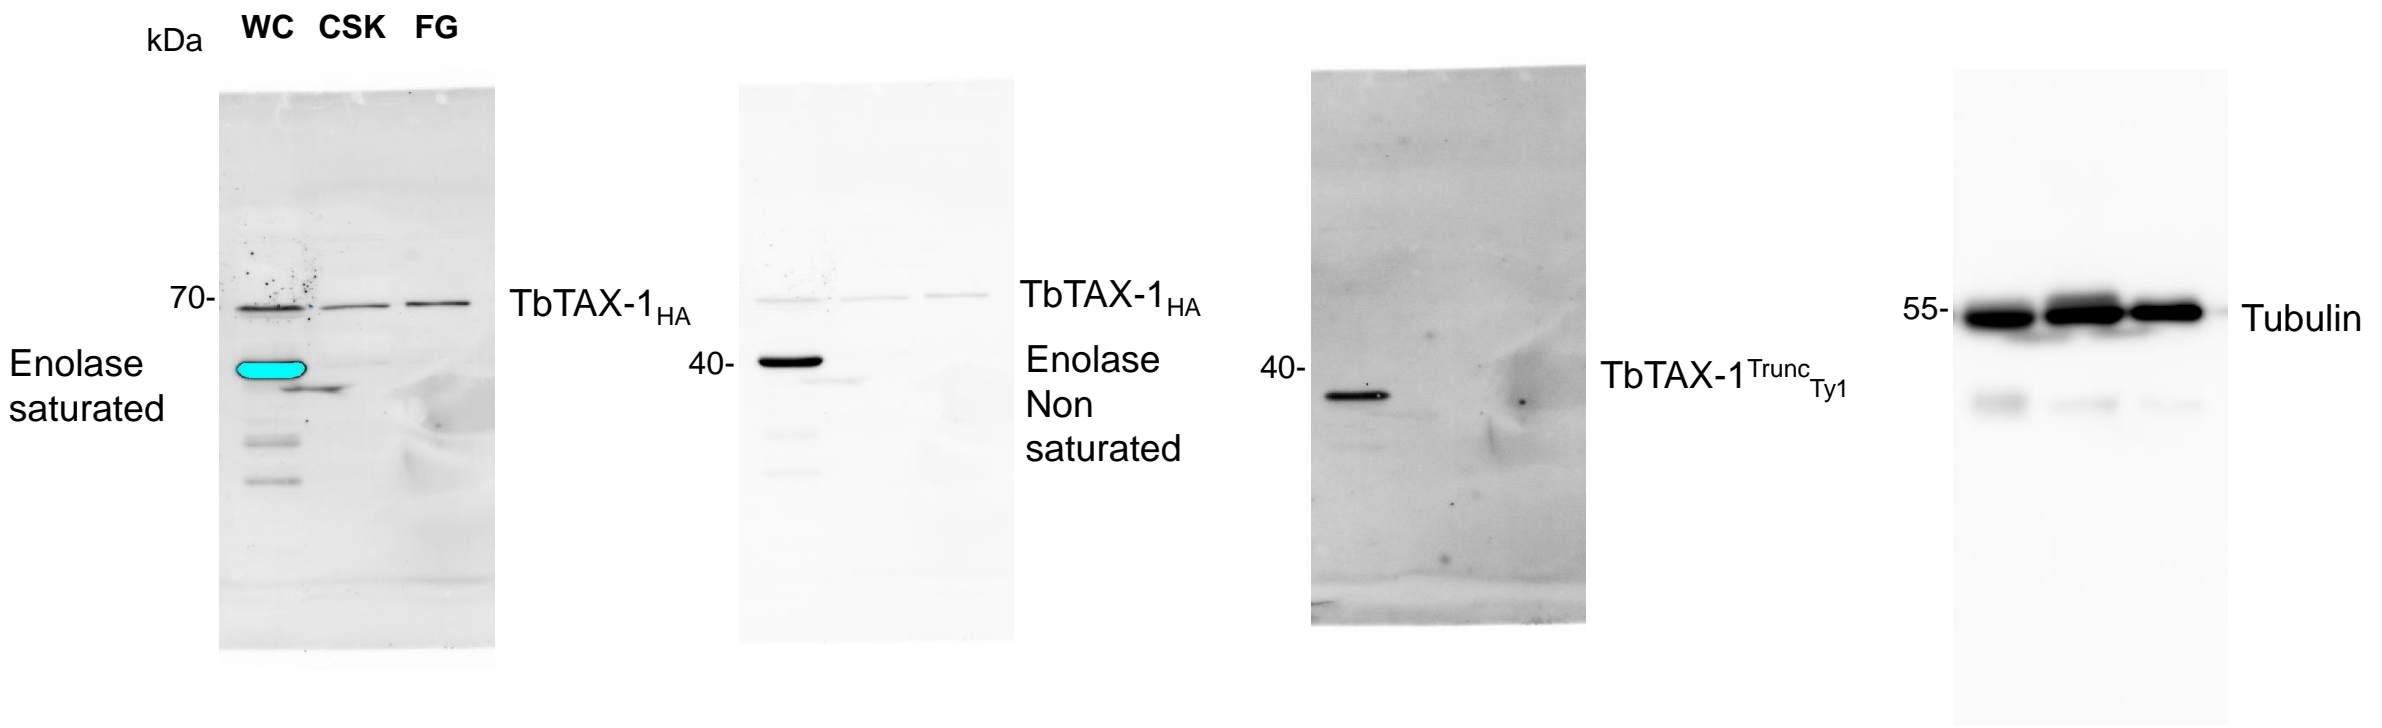

Supplement: fig4-data1 [file elife-87698-fig4-data1-v1.zip]

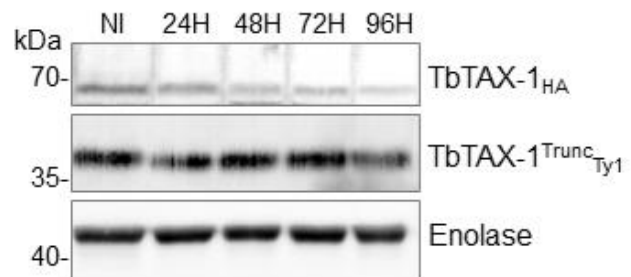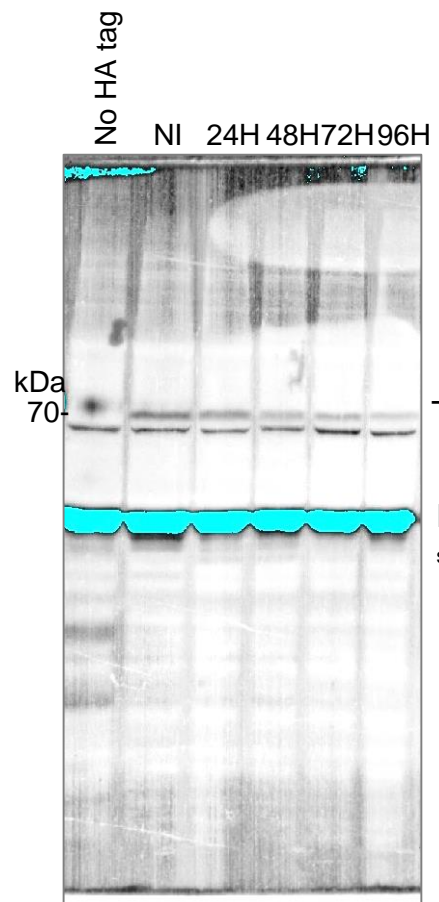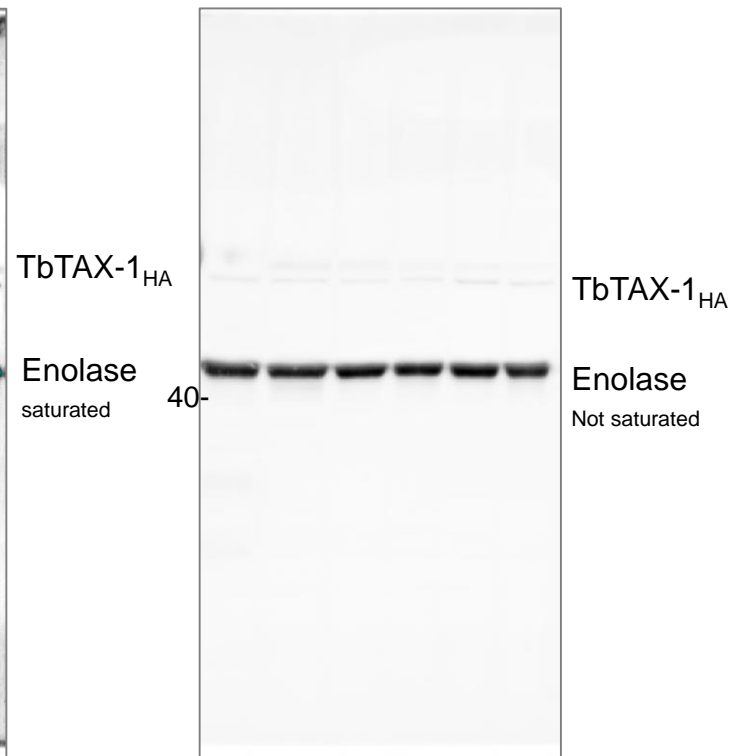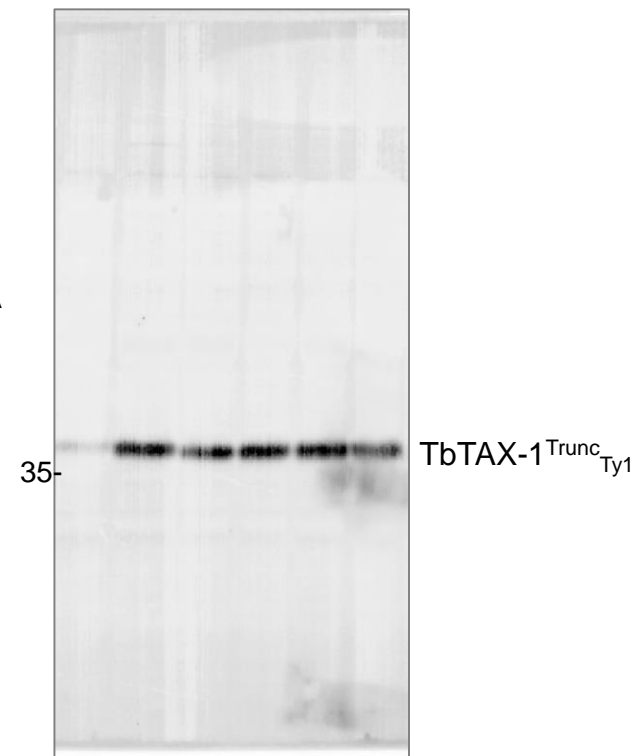

Supplement: fig4-data2 [file Figure 4D-uncropped blots.pdf › Figure 4-source data 2/Figure 4D-uncropped blots.pdf]

**A**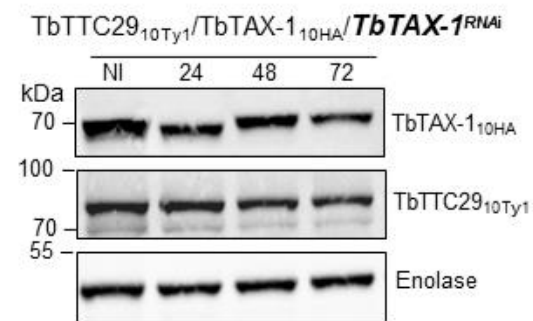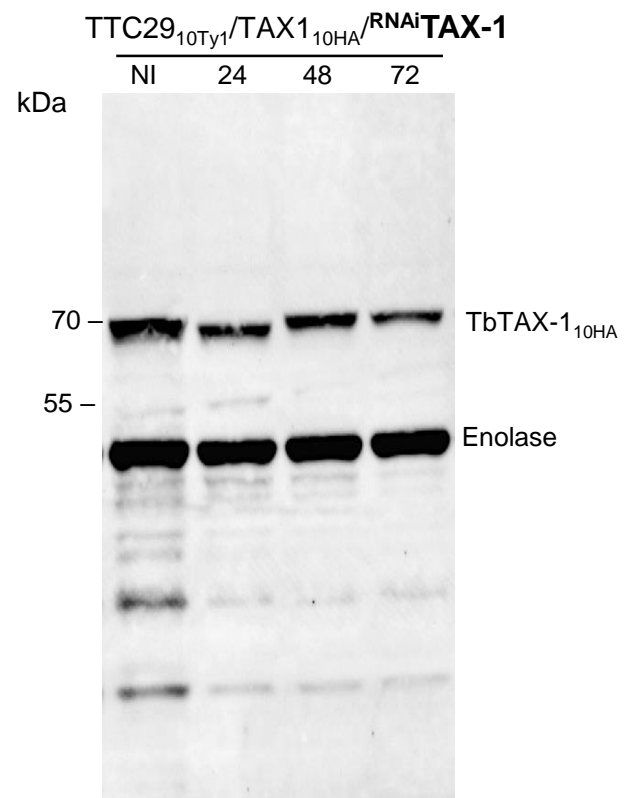

Anti-HA + anti-Enolase

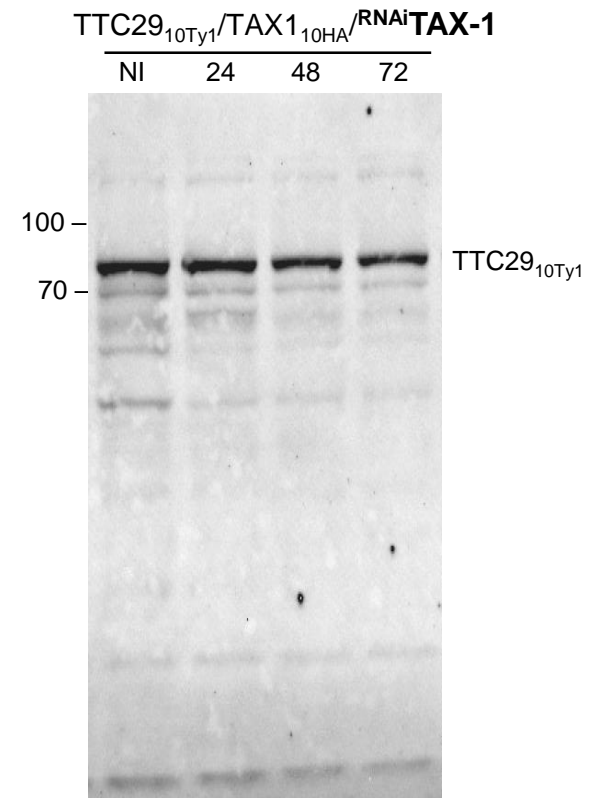

Anti-Ty1 + anti-Enolase

Supplement: fig5-data1 [file Figure 5A-uncropped blots.pdf › Figure 5-source data 1/Figure 5A-uncropped blots.pdf]

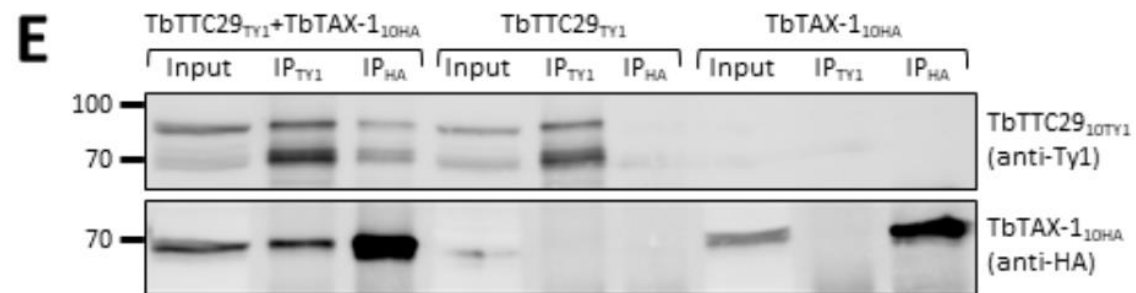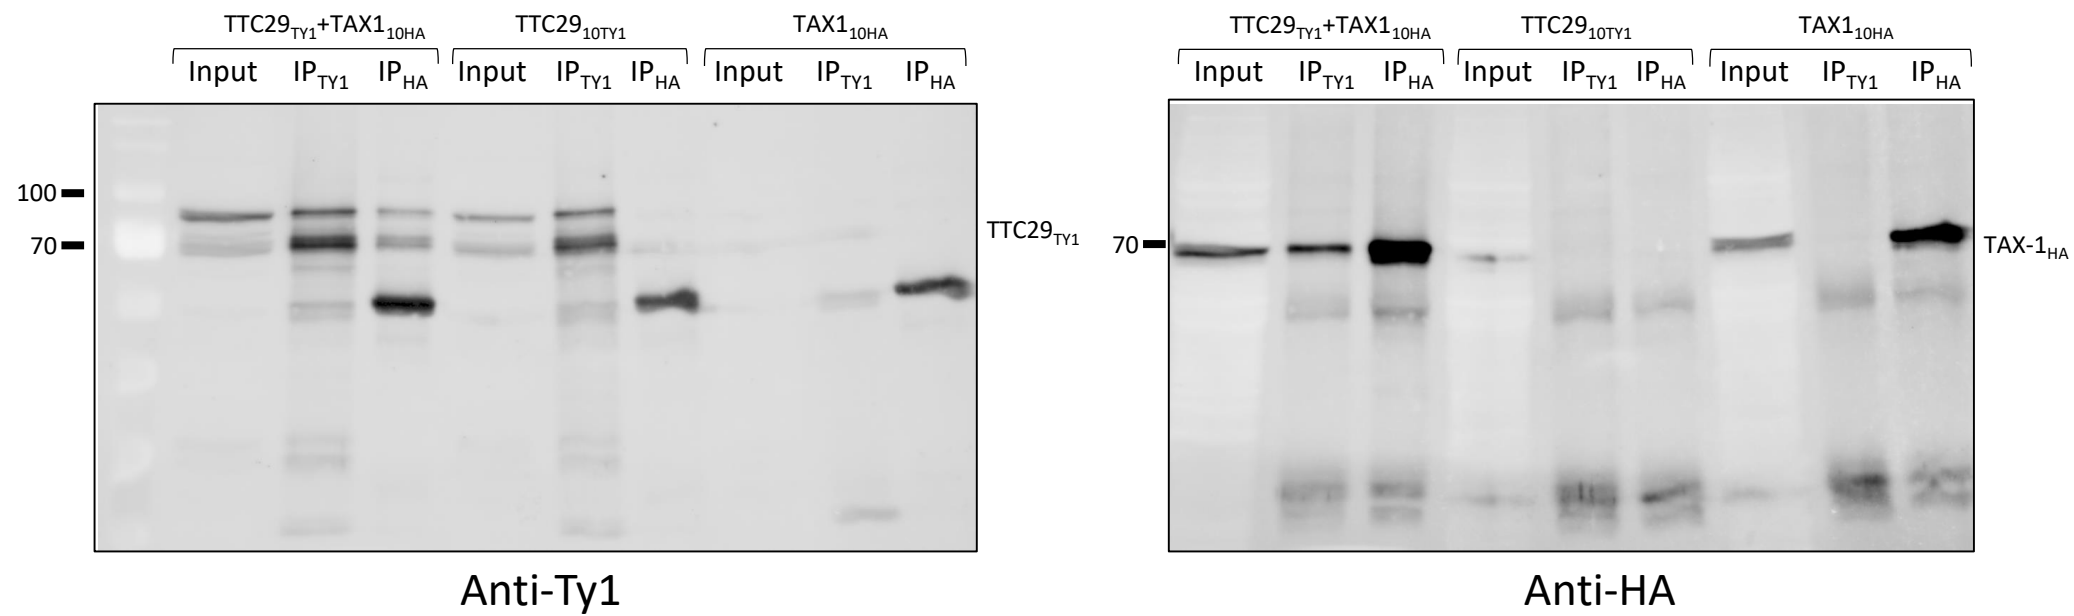

Supplement: fig5-data3 [file elife-87698-fig5-data3-v1.zip]
